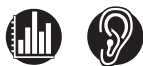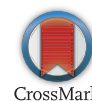

# Second-Line Agents for Glycemic Control for Type 2 Diabetes: Are Newer Agents Better?

Yuanhui Zhang,<sup>1</sup> Rozalina G. McCoy,<sup>2</sup>  
Jennifer E. Mason,<sup>3</sup> Steven A. Smith,<sup>2,4</sup>  
Nilay D. Shah,<sup>4,5</sup> and Brian T. Denton<sup>6</sup>

*Diabetes Care* 2014;37:1338–1345 | DOI: 10.2337/dc13-1901

## OBJECTIVE

While metformin is generally accepted as the first-line agent in treatment of type 2 diabetes, there are insufficient evidence and extensive debate about the best second-line agent. We aimed to assess the benefits and harms of four commonly used antihyperglycemia treatment regimens considering clinical effectiveness, quality of life, and cost.

## RESEARCH DESIGN AND METHODS

We developed and validated a new population-based glycemic control Markov model that simulates natural variation in HbA<sub>1c</sub> progression. The model was calibrated using a U.S. data set of privately insured individuals diagnosed with type 2 diabetes. We compared treatment intensification of metformin monotherapy with sulfonylurea, dipeptidyl peptidase-4 inhibitor, glucagon-like peptide-1 receptor agonist, or insulin. Outcome measures included life-years (LYs), quality-adjusted life-years (QALYs), mean time to insulin dependence, and expected medication cost per QALY from diagnosis to first diabetes complication (ischemic heart disease, myocardial infarction, congestive heart failure, stroke, blindness, renal failure, amputation) or death.

## RESULTS

According to our model, all regimens resulted in similar LYs and QALYs regardless of glycemic control goal, but the regimen with sulfonylurea incurred significantly lower cost per QALY and resulted in the longest time to insulin dependence. An HbA<sub>1c</sub> goal of 7% (53 mmol/mol) produced higher QALYs compared with a goal of 8% (64 mmol/mol) for all regimens.

## CONCLUSIONS

Use of sulfonylurea as second-line therapy for type 2 diabetes generated glycemic control and QALYs comparable with those associated with other agents but at lower cost. A model that incorporates HbA<sub>1c</sub> and diabetes complications can serve as a useful clinical decision tool for selection of treatment options.

Diabetes is one of the most prevalent and costly chronic medical conditions worldwide, incurring significant burdens on individuals, society, and the health care system. It is currently estimated that 25.8 million Americans, or 8.3% of the population, have diabetes (1). Glucose-lowering therapies are the cornerstone of diabetes management, with multiple epidemiological studies linking glycemic control to a lower risk of diabetes-related complications and mortality. Large randomized controlled trials have demonstrated a reduction in microvascular complications

<sup>1</sup>Graduate Program in Operations Research, North Carolina State University, Raleigh, NC

<sup>2</sup>Division of Endocrinology, Department of Internal Medicine, Mayo Clinic, Rochester, MN

<sup>3</sup>Department of Public Health Sciences, University of Virginia, Charlottesville, VA

<sup>4</sup>Division of Health Care Policy and Research, Department of Health Sciences Research, Mayo Clinic, Rochester, MN

<sup>5</sup>Optum Labs, Cambridge, MA

<sup>6</sup>Department of Industrial and Operations Engineering, University of Michigan, Ann Arbor, MI

Corresponding author: Brian T. Denton, btdenton@umich.edu.

Received 10 August 2013 and accepted 15 January 2014.

This article contains Supplementary Data online at <http://care.diabetesjournals.org/lookup/suppl/doi:10.2337/dc13-1901/-/DC1>.

Any opinions, findings, and conclusions or recommendations expressed in this material are those of the authors and do not necessarily reflect the views of the National Science Foundation.

© 2014 by the American Diabetes Association. See <http://creativecommons.org/licenses/by-nc-nd/3.0/> for details.

with intensive glycemic control, e.g., lowering glycosylated hemoglobin (HbA<sub>1c</sub>) to <6.5–8.0% (48–64 mmol/mol), depending on the study (2–9). Evidence linking glycemic control to lower macrovascular disease risk and mortality has been less conclusive; lowering HbA<sub>1c</sub> among younger patients with newly diagnosed diabetes did reduce cardiovascular event rates and mortality in the UK Prospective Diabetes Study (UKPDS) (5,6), but further reductions among people with long-standing diabetes in the Action to Control Cardiovascular Risk in Diabetes (ACCORD) and Action in Diabetes and Vascular Disease: Preterax and Diamicon MR Controlled Evaluation (ADVANCE) studies and Veterans Affairs Diabetes Trial (VADT) did not yield similar results (7–9). The exact glycemic target in the treatment of diabetes therefore remains controversial, with professional groups and regulatory organizations currently recommending lowering HbA<sub>1c</sub> to <6.5% (48 mmol/mol) (10), 7.0% (53 mmol/mol) (11), or 8.0% (64 mmol/mol) (12), except in patients at high risk for hypoglycemia or those with limited life expectancy or multiple comorbid conditions that preclude safe intensive control.

There are currently 11 classes of approved glucose-lowering medications, and the usage of these medications has varied from 1994 to 2007 (13). The 2011 Centers for Disease Control and Prevention diabetes fact sheet reported that 58% of adults with diabetes are being treated with oral agent(s), 12% with insulin, and 14% with both insulin and oral agent(s) (1). Diabetes medications alone accounted for 11.8% of all prescriptions issued in the U.S. in 2012 at a cost of more than 18.3 billion USD (14). Metformin has a long-standing evidence base for efficacy and safety, is inexpensive, and is regarded by most as the primary first-line agent in the treatment of type 2 diabetes (10,11,15). When metformin fails to achieve or maintain glycemic goals, another agent should be added; however, there is no consensus or sufficient empirical evidence supporting the use of one second-line agent over another (16). Over the past decade, the mix of secondary agents used in the treatment of diabetes has changed significantly, with increasing use of newer glucose-lowering agents such as dipeptidyl peptidase-4 (DPP-4)

inhibitors and glucagon-like peptide-1 (GLP-1) receptor agonists in place of older and less expensive drugs such as sulfonylureas. This has resulted in a dramatic rise in the cost of diabetes medications and management; yet, the long-term clinical benefit of this shift is uncertain (13).

In the absence of clinical trials directly comparing alternative treatment regimens and considering the high cost and challenges of running any such trials, we developed and validated a new population-based glycemic control model based on a Markov chain to compare the real-world effectiveness and cost of different treatment regimens for individuals newly diagnosed with type 2 diabetes. We used this model to quantify differences among the regimens in terms of life-years (LYs), quality-adjusted life-years (QALYs), and medication cost per QALY necessary to achieve and maintain glycemic control from the time of diagnosis to the development of first major diabetes-related complication, specifically, ischemic heart disease, stroke, blindness, renal failure, amputation, or death from other cause. We specifically chose these micro- and macrovascular complications of diabetes, as they have been used in most large observational and interventional studies of diabetes therapies (5,7–9). Each regimen was tested using the range of currently recommended glycemic control goals between HbA<sub>1c</sub> 6.5% (48 mmol/mol) and 8% (64 mmol/mol) both to confirm model generalizability and to identify the potential impact of different glycemic control goals on patient health, quality of life, and expenditure.

## RESEARCH DESIGN AND METHODS

### Treatment Regimens

We considered four treatment-intensification regimens: metformin, sulfonylurea, and insulin (T1); metformin, DPP-4 inhibitor, and insulin (T2); metformin, GLP-1 agonist, and insulin (T3); and metformin and insulin (T4). In each regimen, patients started metformin monotherapy when HbA<sub>1c</sub> reached the prespecified glycemic control goal. In T1–T3, treatment was sequentially intensified by addition of a second-line agent other than insulin, and if or when HbA<sub>1c</sub> again exceeded the glycemic control goal, insulin was initiated (in place of the second-line agent) as the third-line agent in combination with metformin. In T4, treatment was intensified

by directly adding insulin once HbA<sub>1c</sub> exceeded the glycemic control goal. For all regimens, there were no further treatment changes once insulin was initiated, as it was assumed to maintain glycemic control.

### Markov Model

The Markov model is based on the 10 discrete HbA<sub>1c</sub> states presented in Supplementary Tables 1 and 2. Each state is defined by the conditional mean HbA<sub>1c</sub> in a given interval for a patient newly diagnosed with type 2 diabetes. The mean HbA<sub>1c</sub> value for each state increases linearly with respect to age according to a linear trend factor. This common assumption, based on other published glycemic control models (17,18), reflects the expected rise in HbA<sub>1c</sub> with age and anticipated deterioration of glycemic control. At the beginning of each 3-month period, treatment is initiated/intensified if HbA<sub>1c</sub> exceeds the glycemic control goal. Treatment results in a proportional decrease in HbA<sub>1c</sub> according to a medication effect estimated from observational data (Table 1). If no diabetes complications or death occurs, patients undergo continued HbA<sub>1c</sub> state transition based on the 3-month transition probability matrices provided in Supplementary Tables 1 and 2. Each treatment regimen was evaluated using the Markov model by backward induction (29). All analyses were conducted using MATLAB R2012b (MathWorks, Inc., Natick, MA).

### Outcome Measures

We considered four outcome measures related to primary prevention: expected LYs, expected QALYs, mean time to insulin dependence, and expected medication cost per QALY for maintaining glycemic control from diagnosis to occurrence of first diabetes-related complication or death. For each period in which no diabetes complications or death occurred, LYs were increased by 3 months, QALYs were adjusted based on the disutility of medications, and the medication cost was calculated based on the sum of the costs of using medications for 3 months discounted at a 3% annual discount rate (30).

### Data Sources

A retrospective administrative claims data set that included medical claims, pharmacy claims, laboratory data, and eligibility information from a large, national U.S. health plan was used to estimate 3-month HbA<sub>1c</sub> state transition probabilities

**Table 1—Model parameters for base-case analysis and sensitivity analysis**

| Parameter (reference no.)                         | Base-case value (range)                        |
|---------------------------------------------------|------------------------------------------------|
| <b>Patient characteristics</b>                    |                                                |
| Diagnosis age (years) (19)                        | Women 55.2; Men 53.6                           |
| Ethnicity                                         | None Afro-Caribbean                            |
| BMI (kg/m <sup>2</sup> ) (20)                     | 32.6                                           |
| Smoking status                                    | Nonsmoker                                      |
| Concurrent comorbidity at diagnosis*              | No                                             |
| Blood pressure (mmHg) (11)†                       | 140                                            |
| Total cholesterol (mg/dL) (21)†                   | 200                                            |
| HDL (mg/dL) (21)†                                 | 40                                             |
| Glycemic control goals, % (mmol/mol) (10–12)      | 7 (53), 6.5 (48), 8 (64)                       |
| <b>Disutility of hypoglycemia (22)</b>            |                                                |
| Metformin                                         | −0.0002                                        |
| Sulfonylurea                                      | −0.0064                                        |
| DPP-4 inhibitor                                   | −0.0002                                        |
| GLP-1 agonist                                     | −0.0005                                        |
| Insulin‡                                          | −0.0143                                        |
| <b>Disutility of weight gain (22)</b>             |                                                |
| Metformin                                         | 0                                              |
| Sulfonylurea                                      | −0.0031                                        |
| DPP-4 inhibitor                                   | 0                                              |
| GLP-1 agonist§                                    | 0.0013                                         |
| Insulin                                           | −0.0031                                        |
| <b>Disutility of injectable medication (22)</b>   |                                                |
| Metformin                                         | 0                                              |
| Sulfonylurea                                      | 0                                              |
| DPP-4 inhibitor                                   | 0                                              |
| GLP-1 agonist                                     | −0.0032                                        |
| Insulin                                           | −0.0032                                        |
| <b>Month medication cost (USD) (16,23)</b>        |                                                |
| Metformin                                         | 81.75 (25.87–181.09)                           |
| Sulfonylurea                                      | 54.85 (9.31–165.57)                            |
| DPP-4 inhibitor                                   | 232.84 (227.66–238.01)                         |
| GLP-1 agonist                                     | 325.97 (165.57–486.37)                         |
| Insulin                                           | 245.70 (189.39–327.54)                         |
| <b>Base-case medication effect  </b>              |                                                |
| Metformin                                         | 0.0661 (0.0620–0.0703)                         |
| Sulfonylurea                                      | 0.0937 (0.0852–0.1022)                         |
| DPP-4 inhibitor                                   | 0.0520 (0.0378–0.0662)                         |
| GLP-1 agonist                                     | 0.0558 (0.0472–0.0644)                         |
| Insulin                                           | Maintain HbA <sub>1c</sub> at 7% (53 mmol/mol) |
| <b>Randomized control trial medication effect</b> |                                                |
| Sulfonylurea (24,25)                              | (0.1282–0.2090)                                |
| DPP-4 inhibitor (24)                              | (0.0588–0.1149)                                |
| GLP-1 agonist (26,27)                             | (0.0886–0.1744)                                |

\*Concurrent comorbidities include peripheral vascular disease, atrial fibrillation, ischemic heart disease, congestive heart failure, and blindness. †Patients' blood pressure, total cholesterol, and HDL were assumed to be well controlled by antihypertension and antihyperlipidemia medications. ‡The disutility of hypoglycemia associated with insulin is set to be 2.24 times the disutility of hypoglycemia associated with sulfonylurea. This choice is motivated by the incidence rate of severe hypoglycemia among patients using each medication provided in ref. 28. §Weight loss is reflected in terms of gains in quality of life; therefore, it is associated with positive number. ||Values in the range represent the 95% CI of the estimated relative effect in reducing HbA<sub>1c</sub>. Sample sizes for estimating clinical effect were 2,118 for metformin, 765 for sulfonylurea, 204 for DPP-4 inhibitor, and 477 for GLP-1 agonist.

Medical (professional, facility) claims include ICD-9, Clinical Modification (ICD-9-CM) diagnosis codes, ICD-9 procedure codes, *Current Procedural Terminology*, version 4 procedure codes, Healthcare Common Procedure Coding System procedure codes, site of service codes, provider specialty codes, and health plan and patient costs. Outpatient pharmacy claims provide National Drug Codes for dispensed medications, quantity dispensed, drug strength, days' supply, provider specialty code, and health plan and patient costs. Laboratory results linked to the administrative claims data are available for a subset of these patients. All study data were accessed using techniques that are in compliance with the Health Insurance Portability and Accountability Act of 1996, and no identifiable protected health information was extracted during the course of the study. Because this study involved analysis of preexisting, de-identified data, it was exempt from institutional review board approval.

The population meeting criteria for our study (37,501 individuals) were age of at least 40 years, diagnosis with type 2 diabetes between 1995 and 2010, prescription for their first noninsulin glucose-lowering medication at least 6 months after enrollment, and at least 5 years of continuous enrollment with at least two HbA<sub>1c</sub> records and complete pharmacy claim data. Type 2 diabetes was defined using the Healthcare Effectiveness Data and Information Set criteria (31). Healthcare Effectiveness Data and Information Set requirements for pharmacy data include at least one anti-hyperglycemia medication prescription and, for claim encounter data, the presence of at least one diabetes-specific ICD-9 diagnosis codes 250.XX (exclude 250.X1 and 250.X3), 357.2X, 362.0X, or 366.41 with two annual face-to-face outpatient encounters with different dates of service or one face-to-face in an acute inpatient or emergency department encounter.

### Model Parameters for Base-Case and Sensitivity Analysis

Model parameters, including base-case values and ranges for sensitivity analysis, are shown in Table 1. We assumed a diagnosis age of 55.2 years for women and 53.6 years for men based on the median age at time of diagnosis of diabetes in the U.S. as of 2011 (19). The initial HbA<sub>1c</sub> state

(Supplementary Data), to estimate the medication effect on reducing HbA<sub>1c</sub> (Supplementary Data), and to calibrate and validate our model (Supplementary Data). The individuals covered by this health plan are geographically diverse

across the U.S. with greatest representation in the south and midwest U.S. census regions. The plan provides fully insured coverage for professional (e.g., physician), facility (e.g., hospital), and outpatient prescription medication services.

distributions for men and women are shown in Supplementary Tables 1 and 2. Treatment regimens were assumed to be fixed for patients living beyond 100 years, and future life expectancy at age 100 years was assumed to be 2.24 years for women and 2.05 years for men based on a 2008 U.S. life table (32).

The probabilities of diabetes complications were determined by a patient's age, sex, ethnicity (Afro-Caribbean or not), smoking status, BMI, HbA<sub>1c</sub>, systolic blood pressure, total cholesterol, and HDL cholesterol; history of peripheral vascular disease, atrial fibrillation, ischemic heart disease, and congestive heart failure; and blindness at diagnosis using the UKPDS outcomes model (33). Probability of death from other cause was estimated based on the Centers for Disease Control and Prevention 2007 mortality tables (34).

The cost of medications other than insulin was based on the federal median price for generic agents and the average wholesale price for brand name agents provided by the Agency for Healthcare Research and Quality Evidence Practice Centers (16). The cost of insulin therapy, including the cost related to self-monitoring of blood glucose, insulin, and insulin-related supplies, was taken from Yeaw et al. (23). All costs were inflation adjusted to 2013 dollars using the consumer price index method (35). For medications other than insulin, the base-case cost was the mean price of all brand name and generic (if available) medicines, and the cost in the range represents the least and the most expensive medicines. The base-case cost for insulin was the mean cost of all insulin regimens including basal insulin regimens, premixed insulin regimens, and basal-bolus insulin regimens. The cost in the range represents the average cost for basal insulin therapy (the least expensive insulin therapy) and the average cost for basal-bolus insulin therapy (the most expensive insulin therapy), respectively.

Medication effect (other than for insulin) was estimated based on HbA<sub>1c</sub> changes seen with use of these agents by patients included in the data set and is presented as the relative reduction in HbA<sub>1c</sub> observed during each 3-month treatment interval.

### Model Calibration and Validation

To calibrate and validate the model, we used all available HbA<sub>1c</sub> pairs at least for 3.5 months to ensure at least one

3-month transition, as long as the patient was not on insulin during that time period. This provided a total of 97,667 pairs of HbA<sub>1c</sub> test results. The linear trend factor was varied from 0 to 0.25 to estimate the trend factor that minimized the mean of the sum of the squared errors (SSE) between the observed HbA<sub>1c</sub> state distribution (determined by the second HbA<sub>1c</sub> value in each pair) and the model-generated HbA<sub>1c</sub> state distributions. The optimal trend factor was 0.1075 for men (mean SSE of 0.0022) and 0.105 for women (mean SSE of 0.0015). Additional details of the model calibration and validation can be found in Supplementary Data.

## RESULTS

### Base-Case Results

The Markov model-based results showed that the expected LYs and QALYs from diagnosis to first event produced by the four treatment regimens were similar (Table 2). The maximum difference among regimens in the expected LYs to first event, specifically, the difference between T4 and T1, was 0.03 years (12.73 days) for women and 0.03 years (11.06 days) for men. Similarly, the maximum difference among regimens in the expected QALYs to the first event, specifically, the difference between T4 and T1, was 0.04 QALYs (16.12 quality-adjusted days) for women and 0.04 QALYs (14.20 quality-adjusted days) for men. The observed differences in expected LYs and QALYs among regimens were primarily the result of different expected durations of sustained glycemic control with the three second-line agents (in combination with metformin). The mean time elapsed between failure

of metformin monotherapy and the need for insulin initiation was 1.05 years (381.99 days) for women and 1.0 year (364.65 days) for men using T1, 0.62 years (224.50 days) for women and 0.53 years (194.84 days) for men using T2, and 0.68 years (247.96 days) for women and 0.62 years (225.46 days) for men using T3.

Significant differences were observed in the expected medication cost per QALY incurred by the four treatment regimens. Compared with using sulfonylurea as a second-line agent, which was the least expensive treatment regimen, use of DPP-4 inhibitor (T2) was associated with a mean per-person additional medication cost of 141 USD per QALY for women and 160 USD per QALY for men. Use of GLP-1 agonist (T3) incurred a mean additional medication cost of 191 USD per QALY for women and 216 USD per QALY for men compared with T1, and use of insulin as a second-line agent (T4) incurred a mean additional medication cost of 150 USD per QALY for women and 170 USD per QALY for men compared with T1.

### Sensitivity Analyses

For any fixed glycemic control goal ranging between 6.5% (48 mmol/mol) and 8.0% (64 mmol/mol), use of sulfonylurea as the second-line agent incurred the lowest expected medication cost per QALY, and GLP-1 agonist use incurred the highest expected medical cost per QALY, among both men and women (Fig. 1). Targeting a treatment goal of 6.5% (48 mmol/mol) vs. 7% (53 mmol/mol) incurred significantly higher expected medication cost per QALY and a small reduction in the expected QALYs for all treatment regimens (Fig. 1). All treatment regimens resulted in

**Table 2—Base-case comparison of four treatment regimens**

| Treatment regimen                       | Women |       |       |       | Men   |       |       |       |
|-----------------------------------------|-------|-------|-------|-------|-------|-------|-------|-------|
|                                         | T1    | T2    | T3    | T4    | T1    | T2    | T3    | T4    |
| Expected LYs                            | 68.66 | 68.63 | 68.64 | 68.63 | 64.58 | 64.55 | 64.55 | 64.54 |
| Expected QALYs                          | 68.41 | 68.39 | 68.39 | 68.37 | 64.38 | 64.35 | 64.35 | 64.34 |
| Expected medication cost (USD) per QALY | 2,600 | 2,741 | 2,791 | 2,750 | 2,675 | 2,835 | 2,891 | 2,845 |
| Mean time to use insulin (years)        | 2.76  | 2.33  | 2.40  | 1.72  | 2.59  | 2.13  | 2.21  | 1.59  |

Comparison of the expected LYs, expected QALYs, expected medication cost per QALY, and mean time from diagnosis to insulin initiation for men and women. Four treatment regimens are T1, metformin plus sulfonylurea plus insulin; T2, metformin plus DPP-4 inhibitor plus insulin; T3, metformin plus GLP-1 agonist plus insulin; and T4, metformin plus insulin.



increased expected QALYs and increased medication cost per QALY when targeting a treatment goal of 7% (53 mmol/mol) compared with 8% (64 mmol/mol) (Fig. 1).

The expected medication cost per QALY of each of the four treatment regimens varied significantly (Fig. 2) as a result of differential costs incurred by generic (metformin, sulfonylurea) compared with brand name (DPP-4, GLP-1) medications and basal insulin compared with basal plus bolus insulin regimens. T3 exhibited the largest variation in the expected medication cost per QALY (503 USD per QALY difference for women and 453 USD per QALY difference for men), while T2 was associated with the smallest variation in the expected medication cost per QALY (291 USD for women and 261 USD for men).

When the effects of sulfonylurea, DPP-4 inhibitor, and GLP-1 agonist on HbA<sub>1c</sub> were simultaneously set to be the lower bound or upper bound of the randomized control trial (RCT) results on the efficacy of medications (Table 1), the four treatment regimens still resulted in similar expected LYs and QALYs from diagnosis to first event. The treatment regimen with sulfonylurea as the second-line agent resulted in the lowest cost per QALY (2,537 USD per QALY for women and 2,612 USD per QALY for men at lower bound and 2,388 USD per QALY for women and

2,454 USD per QALY for men at upper bound), while the treatment regimen with GLP-1 agonist as the second-line agent still produced the highest cost per QALY (2,809 USD per QALY for women and 2,911 USD per QALY for men at lower bound and 2,867 USD per QALY for women and 2,971 USD per QALY for men at upper bound).

## CONCLUSIONS

The conclusions drawn from this study are based on a model and therefore may not be a perfect representation of what would be observed in practice. Direct comparison of four different diabetes treatment regimens by the Markov model developed and validated in this study demonstrated that all four treatment regimens resulted in similar expected benefits in LYs and QALYs irrespective of glycemic control goal. However, for all glycemic control goals ranging between the currently recommended targets of HbA<sub>1c</sub> 6.5% (48 mmol/mol) and 8% (64 mmol/mol), the use of sulfonylurea as the second-line agent incurred the lowest expected medication cost per QALY. These findings hold for both observed effects of medications from real-world data and randomized control trial results. The differences in cost per patient among the four treatment regimens were substantial and thus of potential importance to patients as well as health care providers

and payers. In addition, the treatment regimen with a sulfonylurea as the second-line agent resulted in the longest time of insulin independence compared with all other regimens—an important factor to be considered by patients who wish to delay insulin initiation as long as possible. Conversely, the more expensive treatment options that use a DPP-4 inhibitor or a GLP-1 agonist as the second-line agent were associated with slightly less expected benefit in terms of both LYs and QALYs, and a shorter time of insulin independence, compared with the use of sulfonylurea. Use of insulin as the second-line agent resulted in the shortest time to insulin dependence, and was also significantly more expensive than using sulfonylurea with no added benefit in terms of LYs or QALYs.

To date, there has been no comprehensive side-by-side evaluation of the clinical benefits, effects on quality of life, and costs incurred by different diabetes treatment regimens for glycemic control. Our model fills this gap by integrating real-world knowledge of treatment costs, benefits, and harm, thereby allowing clinicians, payers, and patients to directly compare treatment regimens to select the one that is best suited for each individual patient given his/her specific glycemic control goal, cost sensitivity, and preference. Given that >25 million patients have been diagnosed with type

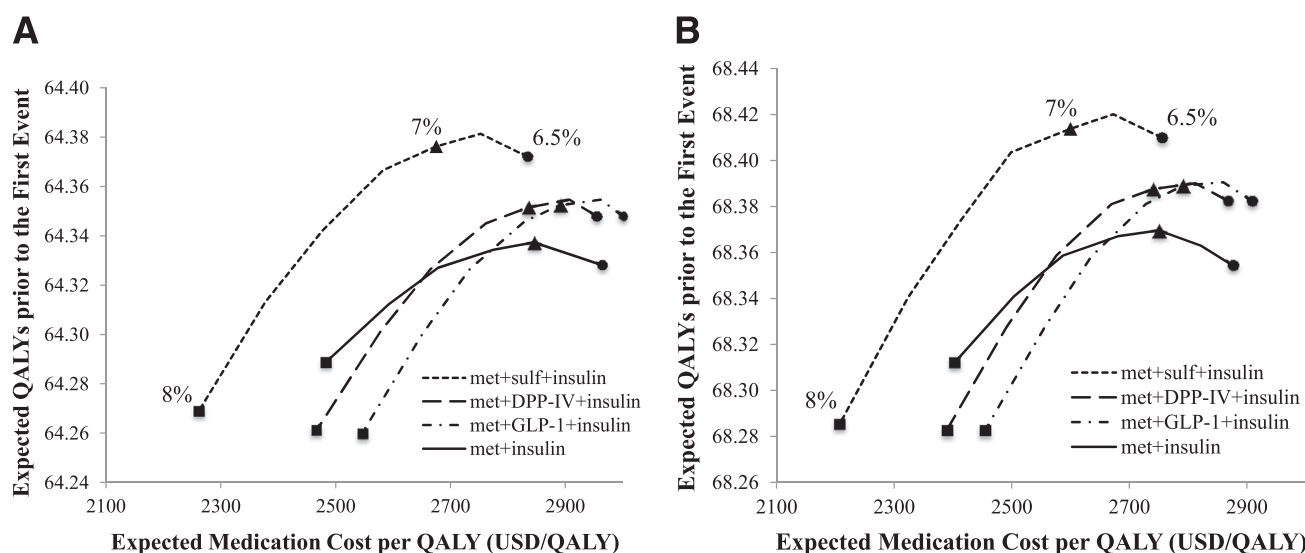

**Figure 1**—QALYs versus cost incurred by the four different treatment regimens as a function of glycemic control goal. Comparison of the expected QALYs versus the expected medication cost per QALY incurred from diagnosis to first event (diabetes-related complication or death) for men (A) and women (B). Each of the four treatments is compared as the glycemic control goal is varied from 6.5% (48 mmol/mol) to 8% (64 mmol/mol). Results are presented using HbA<sub>1c</sub> of 6.5% (48 mmol/mol) (●), 7% (53 mmol/mol) (▲), and 8% (64 mmol/mol) (■) as the glycemic control goal.

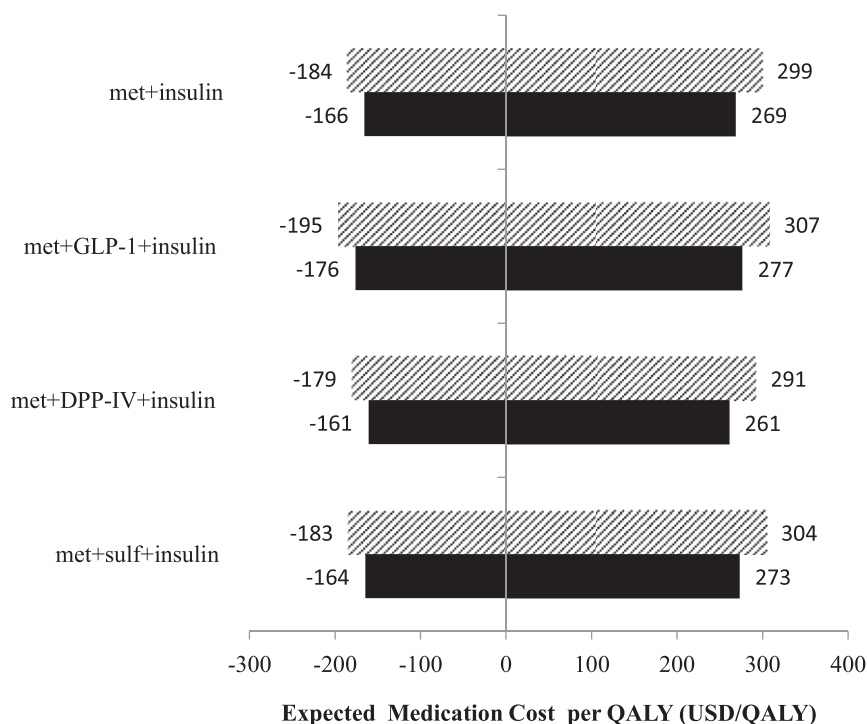

**Figure 2**—Sensitivity analysis on the medication cost. The x-axis represents the difference in the expected medication cost per QALY from the base-case cost: metformin costs 81.75 USD per month, sulfonylurea costs 54.85 USD per month, DPP-4 inhibitor costs 232.84 USD per month, GLP-1 agonist costs 325.97 USD per month, and insulin therapy costs 245.70 USD per month. The y-axis represents the treatment regimen. The solid bar represents men, and the hatched bar represents women. met, metformin; sulf, sulfonylurea.

2 diabetes in the U.S., the potential policy implications of these differences uncovered by our model are also significant.

The Glycemia Reduction Approaches in Diabetes: A Comparative Effectiveness Study (GRADE), which is in the recruitment phase now, seeks to compare the same treatment regimens using a prospective clinical trial design; however, our model is significantly different from that of GRADE in that our results compare QALYs and costs for newly diagnosed patients and because our treatment efficacy is based on data that captures long-term adherence effects that are typically much smaller in clinical trials.

Several models have been developed to predict the natural history of diabetes-related complications progression and to gauge their sequelae on patient quality of life (17,18,36–38); however, none of these models were based on real-world data describing the rate of and variations in HbA<sub>1c</sub> progression caused by both biological changes and patient behavior with and without different treatment modalities. Moreover, none of the previous published models explicitly compared and contrasted different treatment regimens

with regard to their practical efficiency, cost, and clinical benefit based on real-world inputs rather than clinical trial data or select observational study population groups. To our knowledge, this study is the first to develop and validate a glycemic control model that takes into consideration the known adverse effects of treatment, such as hypoglycemia, current medication cost, and various suggested glycemic control goals.

Our model can serve as an adjunctive decision aid to facilitate treatment selection for people newly diagnosed with type 2 diabetes in a way that trades off health and economic implications for patients. It can also be used by health care providers and payers to determine whether a particular treatment option is consistent with the goal of high-value care, e.g., providing a clinically justified benefit given the incurred cost. While no clinical study has yet definitively established the clinical benefit of using incretins in place of sulfonylureas as second-line agents and there is increasing concern regarding sulfonylurea use owing to its association with severe hypoglycemia (10), our model, which considers the side effect of severe

hypoglycemia, suggests that for a glycemic control goal of 6.5% (48 mmol/mol) or 7% (53 mmol/mol), sulfonylureas provide higher value than incretin. Indeed, use of incretins as second-line agents (treatment regimens T2 and T3) resulted in significantly higher cost but slightly less clinical benefit as measured by LYs and QALYs to first incident diabetes-related complication or death. However, ultimate value will depend on patient preference.

Our study has several limitations. First, the results presented in this article are based on a Markov model rather than a clinical trial, and no model can provide a perfect representation of reality. Specifically, our model assumes that HbA<sub>1c</sub> varies among discrete states and at discrete 3-month time intervals rather than continuously; furthermore, transitions among states are assumed to depend only on the most recent HbA<sub>1c</sub> state. For addressing these limitations, the assumptions were carefully validated based on real patient data. Treatment regimens were designed as sequential one-by-one additions of different classes of antihyperglycemic medications, while in clinical practice

patients may start two or more drugs at the same time. We also assumed that insulin would replace the previously used second-line drug, as recommended by most clinical practice guidelines, but it is possible for patients to continue using two or more noninsulin agents in conjunction with insulin. We assumed that insulin will ultimately result in achievement of the glycemic goal; this is an idealized assumption that is based on the physiology of insulin action, and there is likely to be substantial variation among patients in whether they achieve and maintain their glycemic goal over time. Finally, the model is based on data that represents a privately insured population. Therefore, it is possible that these results may not be generalizable to the Medicare and Medicaid populations.

Several features that were not incorporated into the current model are due to insufficient evidence in literature such as the potential variability in how medications influence HbA<sub>1c</sub> trajectory, the potential variability in the duration of observing the effect of medications, and the potential indirect pleiotropic effects of these medications not mediated by their glucose-lowering properties. Medication disutility values were based on limited empirical data because definitive evidence is not yet available. Our analyses were focused on primary prevention of the most common micro- and macrovascular complications of diabetes, and patients included were treatment naïve and newly diagnosed with diabetes. To the extent possible, we have used previously published data on the utility decrements for complications and treatments; however, utility estimates are limited in that they represent an average measure and do not reflect individual patients' well-being. To address this, we performed sensitivity analysis on the utility estimates. Finally, not all known adverse medication effects were included in the model. We did not consider severe nausea and other gastrointestinal side effects of metformin or DPP-4 inhibitors (16), since these symptoms and availability of alternatives would likely cause the medication to be discontinued. We did not consider pancreatitis risk from the new agents due to the uncertainty of this evidence (39,40). Ultimately, however, our proposed model is sufficiently versatile to allow for easy integration of newly acquired clinical knowledge and its continued refinement.

Two key factors that were not explicitly incorporated into the model are medication adherence and lifestyle modifications, both of which are known to improve glycemic control, particularly in early stages of diabetes. However, this is alleviated by our use of real-world observational data for patients who adhere to their treatments and lifestyle recommendations with the frequency expected from any general population among which such therapies are to be deployed. This affords our model an aspect of generalizability and validity that makes it attractive and relevant to patients, health care providers, and payers.

**Funding.** This work was funded in part by Agency for Healthcare Research and Quality under grant 1R21-HS-017628 (to N.D.S.). This material is also based in part on work supported by the National Science Foundation under grant no. CMMI-0969885 (to B.T.D.).

The funders had no role in the study design, data collection and analysis, decision to publish, or preparation of the manuscript.

**Duality of Interest.** No potential conflicts of interest relevant to this article were reported.

**Author Contributions.** Y.Z. designed the study, developed the model, performed the data analysis, interpreted the results, wrote the manuscript, and reviewed and edited the manuscript. R.G.M. contributed to the results interpretation and discussion, wrote the manuscript, and reviewed and edited the manuscript. J.E.M. provided critical recommendations regarding study design and methodology, contributed to the results interpretation and discussion, and reviewed and edited the manuscript. S.A.S. provided critical recommendations regarding study design, contributed to the results interpretation and discussion, and reviewed and edited the manuscript. N.D.S. provided funding for the acquisition of data, provided critical recommendations regarding study design, contributed to the results interpretation and discussion, and reviewed and edited the manuscript. B.T.D. provided funding for the study, provided critical recommendations regarding study design and methodology, contributed to the results interpretation and discussion, and reviewed and edited the manuscript. Y.Z. is the guarantor of this work and, as such, had full access to all the data in the study and takes responsibility for the integrity of the data and the accuracy of the data analysis.

## References

- Centers for Disease Control and Prevention. *National Diabetes Fact Sheet: National Estimates and General Information on Diabetes and Prediabetes in the United States, 2011*. Atlanta, GA, Department of Health and Human Services, Centers for Disease Control and Prevention, 2011
- The Diabetes Control and Complications Trial Research Group. The effect of intensive treatment of diabetes on the development and progression of long-term complications in insulin-dependent

- diabetes mellitus. *N Engl J Med* 1993;329:977–986
- Nathan DM, Cleary PA, Backlund JY, et al.; Diabetes Control and Complications Trial/Epidemiology of Diabetes Interventions and Complications (DCCT/EDIC) Study Research Group. Intensive diabetes treatment and cardiovascular disease in patients with type 1 diabetes. *N Engl J Med* 2005;353:2643–2653
- Ohkubo Y, Kishikawa H, Araki E, et al. Intensive insulin therapy prevents the progression of diabetic microvascular complications in Japanese patients with non-insulin-dependent diabetes mellitus: a randomized prospective 6-year study. *Diabetes Res Clin Pract* 1995;28:103–117
- UK Prospective Diabetes Study (UKPDS) Group. Intensive blood-glucose control with sulphonylureas or insulin compared with conventional treatment and risk of complications in patients with type 2 diabetes (UKPDS 33). *Lancet* 1998;352:837–853
- Stratton IM, Adler AI, Neil HA, et al. Association of glycaemia with macrovascular and microvascular complications of type 2 diabetes (UKPDS 35): prospective observational study. *BMJ* 2000;321:405–412
- Ismail-Beigi F, Craven T, Banerji MA, et al.; ACCORD trial group. Effect of intensive treatment of hyperglycaemia on microvascular outcomes in type 2 diabetes: an analysis of the ACCORD randomised trial. *Lancet* 2010;376:419–430
- Patel A, MacMahon S, Chalmers J, et al.; ADVANCE Collaborative Group. Intensive blood glucose control and vascular outcomes in patients with type 2 diabetes. *N Engl J Med* 2008;358:2560–2572
- Duckworth W, Abraira C, Moritz T, et al.; VADT Investigators. Glucose control and vascular complications in veterans with type 2 diabetes. *N Engl J Med* 2009;360:129–139
- Garber AJ, Abrahamson MJ, Barzilay JI, et al.; American Association of Clinical Endocrinologists. AACE comprehensive diabetes management algorithm 2013. *Endocr Pract* 2013;19:327–336
- American Diabetes Association. Standards of medical care in diabetes—2013. *Diabetes Care* 2013;36(Suppl. 1):S11–S66
- Riethof M, Flavin PL, Lindvall B, et al.; Institute for Clinical Systems Improvement. Diagnosis and management of type 2 diabetes mellitus in adults [internet], 2012. Available from <http://bit.ly/diabetes0412>. Accessed 27 May 2013
- Alexander GC, Sehgal NL, Moloney RM, Stafford RS. National trends in treatment of type 2 diabetes mellitus, 1994–2007. *Arch Intern Med* 2008;168:2088–2094
- American Diabetes Association. Economic costs of diabetes in the U.S. in 2012. *Diabetes Care* 2013;36:1033–1046
- Holman RR, Paul SK, Bethel MA, Matthews DR, Neil HA. 10-year follow-up of intensive glucose control in type 2 diabetes. *N Engl J Med* 2008;359:1577–1589
- Bennett WL, Wilson LM, Bolen S, et al. Oral diabetes medications for adults with type 2 diabetes: an update. In *Comparative Effectiveness Reviews*, No. 27. Rockville, MD, U.S. Agency for Healthcare Research and Quality, 2011
- CDC Diabetes Cost-effectiveness Group. Cost-effectiveness of intensive glycemic control,

intensified hypertension control, and serum cholesterol level reduction for type 2 diabetes. *JAMA* 2002;287:2542–2551

18. Chen J, Alemao E, Yin D, Cook J. Development of a diabetes treatment simulation model: with application to assessing alternative treatment intensification strategies on survival and diabetes-related complications. *Diabetes Obes Metab* 2008;10(Suppl. 1):33–42
19. Centers for Disease Control and Prevention. Age at diagnosis of diabetes among adult incident cases aged 18–79 years [internet]. Available from [http://www.cdc.gov/diabetes/statistics/incidence\\_national.htm](http://www.cdc.gov/diabetes/statistics/incidence_national.htm). Accessed 28 May 2013
20. Kramer H, Cao G, Dugas L, Luke A, Cooper R, Durazo-Arvizu R. Increasing BMI and waist circumference and prevalence of obesity among adults with Type 2 diabetes: the National Health and Nutrition Examination Surveys. *J Diabetes Complications* 2010;24:368–374
21. Expert Panel on Detection, Evaluation, and Treatment of High Blood Cholesterol in Adults. Executive Summary of the Third Report of The National Cholesterol Education Program (NCEP) Expert Panel on Detection, Evaluation, and Treatment of High Blood Cholesterol in Adults (Adult Treatment Panel III). *JAMA* 2001;285:2486–2497
22. Sinha A, Rajan M, Hoerger T, Pogach L. Costs and consequences associated with newer medications for glycemic control in type 2 diabetes. *Diabetes Care* 2010;33:695–700
23. Yeaw J, Lee WC, Aagren M, Christensen T. Cost of self-monitoring of blood glucose in the United States among patients on an insulin regimen for diabetes. *J Manag Care Pharm* 2012;18:21–32
24. DeFronzo RA, Stonehouse AH, Han J, Wintle ME. Relationship of baseline HbA1c and efficacy of current glucose-lowering therapies: a meta-analysis of randomized clinical trials. *Diabetes* 2010;27:309–317
25. Hermann LS, Schersten B, Bitzén PO, Kjellström T, Lindgärde F, Melander A. Therapeutic comparison of metformin and sulfonylurea, alone and in various combinations. A double-blind controlled study. *Diabetes Care* 1994;17:1100–1109
26. Russell-Jones D, Cuddihy RM, Hanefeld M, et al.; DURATION-4 Study Group. Efficacy and safety of exenatide once weekly versus metformin, pioglitazone, and sitagliptin used as monotherapy in drug-naïve patients with type 2 diabetes (DURATION-4): a 26-week double-blind study. *Diabetes Care* 2012;35:252–258
27. Moretto TJ, Milton DR, Ridge TD, et al. Efficacy and tolerability of exenatide monotherapy over 24 weeks in antidiabetic drug-naïve patients with type 2 diabetes: a randomized, double-blind, placebo-controlled, parallel-group study. *Clin Ther* 2008;30:1448–1460
28. Shorr RI, Ray WA, Daugherty JR, Griffin MR. Incidence and risk factors for serious hypoglycemia in older persons using insulin or sulfonylureas. *Arch Intern Med* 1997;157:1681–1686
29. Puterman ML. *Markov Decision Processes: Discrete Stochastic Dynamic Programming*. Hoboken, NJ, John Wiley & Sons, Inc., 1994
30. Siegel JE, Weinstein MC, Russell LB, Gold MR; Panel on Cost-Effectiveness in Health and Medicine. Recommendations for reporting cost-effectiveness analyses. *JAMA* 1996;276:1339–1341
31. National Committee for Quality Assurance (NCQA). HEDIS 2009 Volume 2: Technical Update [Internet]. Available from [http://www.ncqa.org/portals/0/PolicyUpdates/HEDIS%20Technical%20Updates/2009\\_Vol2\\_Technical\\_Update.pdf](http://www.ncqa.org/portals/0/PolicyUpdates/HEDIS%20Technical%20Updates/2009_Vol2_Technical_Update.pdf). Accessed 20 May 2013
32. Arias E. United States life tables, 2008. In *National Vital Statistics Reports*. Hyattsville, MD, National Center for Health Statistics, 2012
33. Clarke PM, Gray AM, Briggs A, et al.; UK Prospective Diabetes Study (UKPDS) Group. A model to estimate the lifetime health outcomes of patients with type 2 diabetes: the United Kingdom Prospective Diabetes Study (UKPDS) Outcomes Model (UKPDS no. 68). *Diabetologia* 2004;47:1747–1759
34. Centers for Disease Control and Prevention. Deaths, percent of total deaths, and death rates for the 15 leading causes of death in 10-year age groups, by race and sex: United States, 1999–2010 [internet]. Available from <http://www.cdc.gov/nchs/nvss/mortality/lcwk2.htm>. Accessed 20 May 2013
35. U.S. Bureau of Labor Statistics. CPI inflation calculator [internet]. Available from [http://www.bls.gov/data/inflation\\_calculator.htm](http://www.bls.gov/data/inflation_calculator.htm). Accessed 20 May 2013
36. Bagust A, Hopkinson PK, Maier W, Currie CJ. An economic model of the long-term health care burden of Type II diabetes. *Diabetologia* 2001;44:2140–2155
37. Eastman RC, Javitt JC, Herman WH, et al. Model of complications of NIDDM. I. Model construction and assumptions. *Diabetes Care* 1997;20:725–734
38. Zhou H, Isaman DJ, Messinger S, et al. A computer simulation model of diabetes progression, quality of life, and cost. *Diabetes Care* 2005;28:2856–2863
39. Singh S, Chang HY, Richards TM, Weiner JP, Clark JM, Segal JB. Glucagonlike peptide 1-based therapies and risk of hospitalization for acute pancreatitis in type 2 diabetes mellitus: a population-based matched case-control study. *JAMA Intern Med* 2013;173:534–539
40. Dore DD, Seeger JD, Arnold Chan K. Use of a claims-based active drug safety surveillance system to assess the risk of acute pancreatitis with exenatide or sitagliptin compared to metformin or glyburide. *Curr Med Res Opin* 2009;25:1019–1027
